# Supplementary material
Source: PubMed Central journal article supplement (PMC4305187)

Supplementary figure 1

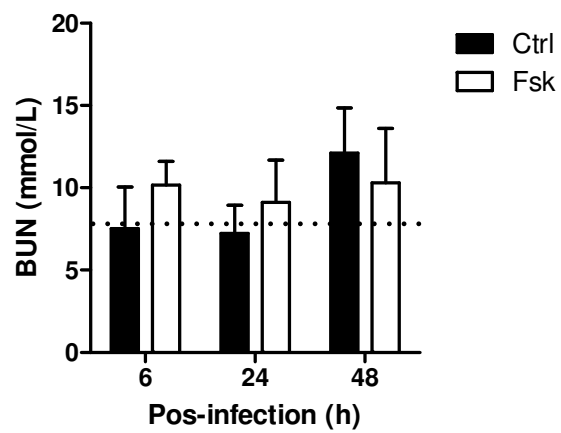

Supplement: mmc1.pdf [file mmc1.pdf]

Supplementary figure 2

A

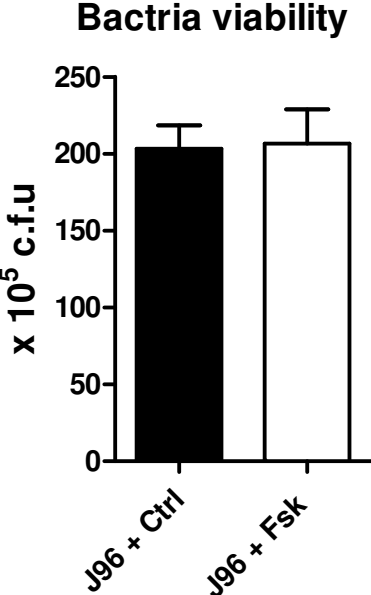

B

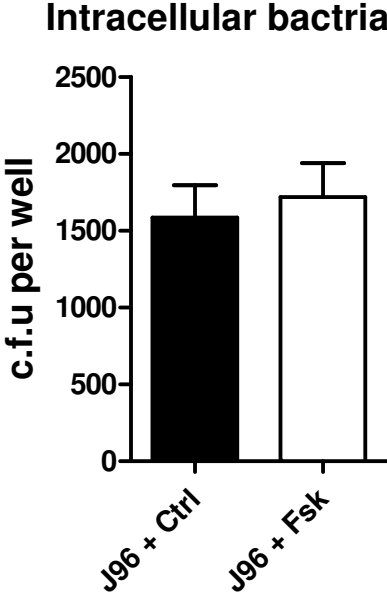

Supplement: mmc2.pdf [file mmc2.pdf]

### Supplementary figure 3

A

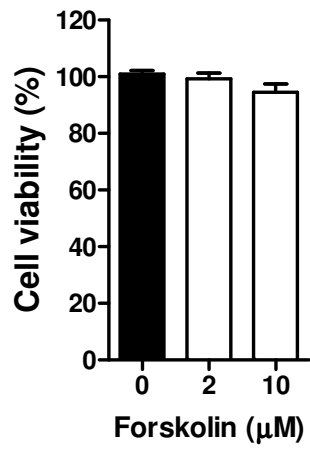

B

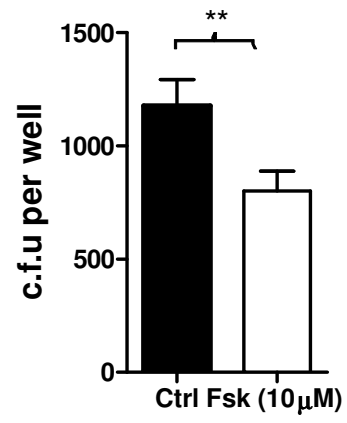

Supplement: mmc3.pdf [file mmc3.pdf]
